# Supplementary material
Source: PubMed Central journal article supplement (PMC2811263)
Supplement: NIHMS169490-supplement-supplement_1.pdf [file NIHMS169490-supplement-supplement_1.pdf]

## SUPPLEMENT MATERIAL

Supplemental Table I. Amplification and sequencing primers for *GPIHBP1*.

| Region   | Primer sequence                 | Product size (bp) |
|----------|---------------------------------|-------------------|
| Promoter | F: 5'-GAGGGGTGTCAGGCATGG-3'     | 400               |
|          | R: 5'-AGAGGGCAAGCAGGACAG-3'     |                   |
| Promoter | F: 5'-GACCCGAGGTGATAGTGAGG-3'   | 399               |
|          | R: 5'-AGTCATTGTGGTTGGCCTTG-3'   |                   |
| Promoter | F: 5'-AGAGCCTCGACTCTGCACTC-3'   | 375               |
|          | R: 5'-AACACAGTCAATGCCCTCAAG-3'  |                   |
| Exon 1   | F: 5'-CTTCATCCCACCTTACCGCAGC-3' | 226               |
|          | R: 5'-CTCCTTCTTCCTAAGCCCCTG-3'  |                   |
| Exon 2   | F: 5'-ATGCTTGCCCAGAGCAGGTGTC-3' | 282 <sup>7</sup>  |
|          | R: 5'-GCCTGCTGGCTTCCATCACAC-3'  |                   |
| Exon 3   | F: 5'-CATCTGAGCAGTGGGTGCTGG-3'  | 330               |
|          | R: 5'-AGGTGGCTCTGCAGGGCTC-3'    |                   |
| Exon 4   | F: 5'-AACACCGGTAAGTGGGCGTG-3'   | 504               |
|          | R: 5'-CAAATCCATTCTCCAAAGCTGG-3' |                   |

F, forward primer; R, reverse primer.

Supplemental Table II. Amplification and sequencing primers for *LPL*, *APOA5*, and *APOC2*.

| Region     | Primer sequence                                                               | Product (bp) |
|------------|-------------------------------------------------------------------------------|--------------|
| <i>LPL</i> |                                                                               |              |
| Promoter   | F: 5'-GAGGGAGGACTGCAAGTGAC-3'<br>R: 5'-AGCTTCCCTTGAGGAGGAG-3'                 | 443          |
| Promoter   | F: 5'-ATTTGACCTCGATGTTCTGC-3'<br>R: 5'-ACAGGTTTACATCGATTCACG-3'               | 400          |
| Exon 1     | F: 5'-GTAGAGTGGAAACCCCTTAAGCTAAGCG-3'<br>R: 5'-ACGCCCGGTCTGCAGGTGGAGGG-3'     | 548          |
| Exon 2     | F: 5'-AACCTCCAGTTAACCTCATATCC-3'<br>R: 5'-CACCACCCCAATCCACTCTTCCCC-3'         | 241          |
| Exon 3     | F: 5'-GAACAGCCGGTTTTCTGGCTCCAGTC-3'<br>R: 5'-GCTAGGTGGGTATTTTAAGAAAGCTTGTG-3' | 293          |
| Exon 4     | F: 5'-GAATTAGTTTTCAGTATTTCTATATTTGG-3'<br>R: 5'-CTCTCAGAATGACAGTCTTTTCACC-3'  | 286          |
| Exon 5     | F: 5'-GCAGTGACATGCGAATGTCATACG-3'<br>R: 5'-GGACATTGGGTCAATAAGGGTTAAGG-3'      | 368          |
| Exon 6     | F: 5'-CCACATCTCACCTATTTTAGACATGCC-3'<br>R: 5'-GCAGTGAGCATGATGAAATAGGACTCC-3'  | 393          |
| Exon 7     | F: 5'-GAGTTCCATGTGTGTGCACTTCCGG-3'<br>R: 5'-CAGGAGAGGGACTGGTGCCATGATG-3'      | 299          |
| Exon 8     | F: 5'-AAGTGGGGGGCAGGGAGAGCTGATC-3'<br>R: 5'-CATCAGGTGGGGGTCTAAAGTGAAGG-3'     | 291          |

|         |                                      |     |
|---------|--------------------------------------|-----|
| Exon 9  | F: 5'-GATTCTGATGTGGCCTGAGTGTGACAG-3' | 358 |
|         | R: 5'-GCTGGTGATGGGGTGAAGAGGAATGC-3'  |     |
| Exon 10 | F: 5'-CACATCTCCCCTGGGTTTATTCTCAC-3'  | 562 |
|         | R: 5'-GTAAAGTTTGAGAAGGCCTCAGTCC-3'   |     |

---

*APOA5*

|           |                                |     |
|-----------|--------------------------------|-----|
| Exons 1–2 | F: 5'-TAACAGGATTTTCGGGCAGTT-3' | 484 |
|           | R: 5'-ACAGAGGTTGAGGCAGCAGA-3'  |     |
| Exon 3    | F: 5'-GATGACTTGGGGACAAAGGA-3'  | 394 |
|           | R: 5'-ACTGGGCCTTGGTGTCTTC-3'   |     |
| Exon 3    | F: 5'-CTGGAATTTGGAGGGCTTG-3'   | 486 |
|           | R: 5'-CCCTTCCTCAGTCCCAGTG-3'   |     |
| Exon 3    | F: 5'-CATCCAGCAGAACCTGGAC-3'   | 490 |
|           | R: 5'-CCCAACCAGGCCACTTTCA-3'   |     |

---

*APOC2*

|        |                               |     |
|--------|-------------------------------|-----|
| Exon 1 | F: 5'-GCTGTGTCCAAGTCCATGC-3'  | 379 |
|        | R: 5'-GGGGGAGAGTGTGTCAGGAG-3' |     |
| Exon 2 | F: 5'-CTGCCCTCTCCTCTTCTTCC-3' | 302 |
|        | R: 5'-TCTGGGTCCTGGATGCAGT-3'  |     |
| Exon 3 | F: 5'-CATACCTGCCCGCTGTAGAT-3' | 538 |
|        | R: 5'-TCAGGCTAGAGTTGGGAGGA-3' |     |

---

F, forward primer; R, reverse primer.
